# Supplementary material for: NTRK gene aberrations in triple‐negative breast cancer: detection challenges using IHC, FISH, RT‐PCR, and NGS
Source: PubMed Central journal article supplement (PMC10397374; doi:10.1002/cjp2.324), 2023-05-04
Supplement: CJP2-9-367-s001.pdf [file CJP2-9-367-s001.pdf]

## ***NTRK* gene aberrations in triple-negative breast cancer: detection challenges using IHC, FISH, RT-PCR, and NGS**

F Zito Marino *et al.*, *J Pathol Clin Res*, <https://doi.org/10.1002/cjp2.324>

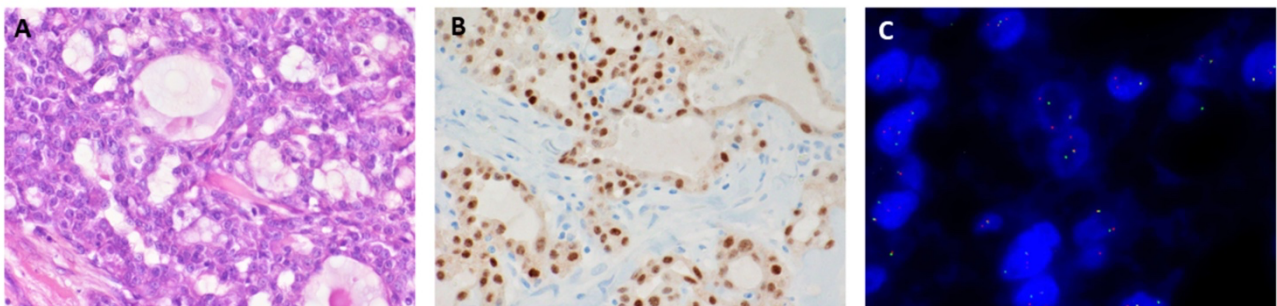

**Figure S1.** Representative results from a secretory breast carcinoma used as a positive control: (A) hematoxylin and eosin staining (original magnification  $\times 40$ ); (B) Pan-TRK IHC showing strong nuclear immunoreactivity in neoplastic cells (original magnification  $\times 40$ ); (C) *NTRK3* FISH showing the typical pattern of rearrangement: one fusion signal and split 3' and 5' signals, with a separation distance of at least two signal diameters between the green and orange signals (original magnification  $\times 100$ ).

**Table S1.** Panel of gene fusions detected but not distinguishable by RT-PCR.

| <b>Target</b> | <b>Exon</b>    | <b>Gene fusion</b>            |
|---------------|----------------|-------------------------------|
| <i>NTRK1</i>  | exon 9–10      | TFG-NTRK1 T5:N9               |
|               |                | NFASC-NTRK1 N20:N10           |
|               |                | NFASC-NTRK1 N21:N10           |
|               | exon 10        | SQSTM1-NTRK1 S4:N10           |
|               |                | TFG-NTRK1 T5:N10              |
|               |                | TPM3-NTRK1 T7:N10             |
|               |                | TPR-NTRK1 T21:N10             |
|               |                | TRIM63-NTRK1 T8:N10           |
|               |                | BCAN-NTRK1 B13:N11            |
|               |                | LMNA-NTRK1 L11 del178:N11     |
|               | exon 11–12 del | LMNA-NTRK1 L2:N11             |
|               |                | PPL-NTRK1 P22 del2181:N11     |
|               |                | TPR-NTRK1 T6 del122:N12 del99 |
|               |                | MPRIP-NTRK1 M21:N12           |
|               |                | MPRIP-NTRK1 M18:N12           |
|               | exon 12        | MPRIP-NTRK1 M14:N12           |
|               |                | SCYL3-NTRK1 S11:N12           |
|               |                | TPM3-NTRK1 T7:N1              |
|               |                | TPR-NTRK1 T6:N12              |
|               |                | AFAP1-NTRK2 A13:N12           |
| <i>NTRK2</i>  | exon 12–15     | VCL-NTRK2 V16:N12             |
|               |                | TLE4-NTRK2 T7:N15             |
|               |                | TRIM24-NTRK2 T12:N15          |
|               |                | AGBL4-NTRK2 A6:N16            |
|               | exon 16–17     | QKI-NTRK2 Q6:N16              |
|               |                | SQSTM1-NTRK2 S4:N16           |
|               |                | STRN-NTRK2 S3:N16             |
| <i>NTRK3</i>  | exon 14        | SQSTM1-NTRK2 S4:N17           |
|               |                | ETV6-NTRK3 E4:N14             |
|               |                | ETV6-NTRK3 E5:N14             |
|               | exon 15        | ETV6-NTRK3 E4:N15             |
|               |                | ETV6-NTRK3 E5:N15             |
|               |                | ETV6-NTRK3 E5:N15             |
